# Supplementary material for: Synthesis of glycoluril-tetrathiafulvalene molecular clips for electron-deficient neutral guests through a straightforward Diels–Alder strategy
Source: Royal Society of Chemistry journal article supplement (doi:10.1039/c4nj00617h), 2014-08-26
Supplement: c4nj00617h1.pdf [file c4nj00617h1.pdf]

SUPPORTING INFORMATION for

**Synthesis of Glycoluril-Tetrathiafulvalene Molecular Clips for Electron-Deficient Neutral Guests through a Straightforward Diels-Alder Strategy**

**Marie Hardouin - Lerouge, Yoann Cotelle, Stéphanie Legoupy and Piétrick Hudhomme\***

*Université d'Angers, Laboratoire MOLTECH-Anjou, CNRS UMR 6200,  
2 Boulevard Lavoisier, F-49045 Angers, France  
[pietrick.hudhomme@univ-angers.fr](mailto:pietrick.hudhomme@univ-angers.fr)*

**Table of contents :**

|                                                                                                                                          |     |
|------------------------------------------------------------------------------------------------------------------------------------------|-----|
| <sup>1</sup> H NMR spectrum of compound 5                                                                                                | S2  |
| <sup>13</sup> C NMR spectrum of compound 5                                                                                               | S3  |
| <sup>1</sup> H NMR spectrum of clip 1                                                                                                    | S4  |
| <sup>13</sup> C NMR spectrum of clip 1                                                                                                   | S6  |
| MALDI-TOF spectrum of clip 1                                                                                                             | S7  |
| Theoretical calculations                                                                                                                 | S9  |
| Cyclic voltammetry of clip 1                                                                                                             | S10 |
| Cyclic voltammetry of the molecular clip 1 titration with F4-TCNQ                                                                        | S11 |
| <sup>19</sup> F NMR spectra (CD <sub>2</sub> Cl <sub>2</sub> ) of F <sub>4</sub> -TCNQ before and after its addition to molecular clip 1 | S12 |
| Determination of binding constants by UV-Visible titration                                                                               | S14 |
| Chemical oxidation of molecular clip 1 followed by UV-Visible spectroscopy                                                               | S15 |

**<sup>1</sup>H NMR spectrum of compound 5 (CDCl<sub>3</sub>, 300 MHz) :**

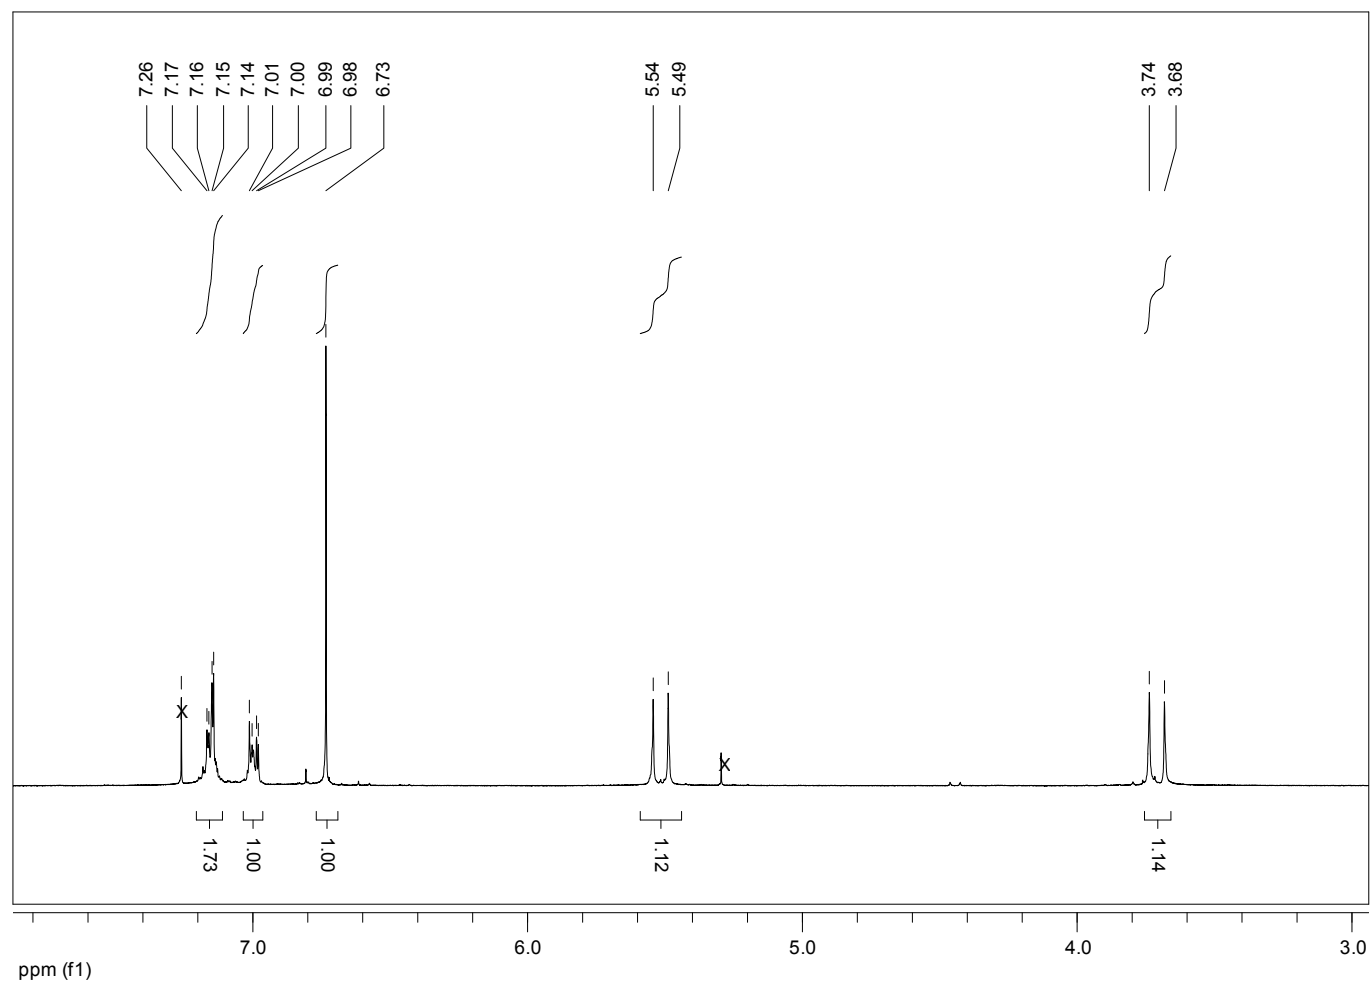

**$^{13}\text{C}$  NMR spectrum of compound 5 ( $\text{CDCl}_3$ , 300 MHz) :**

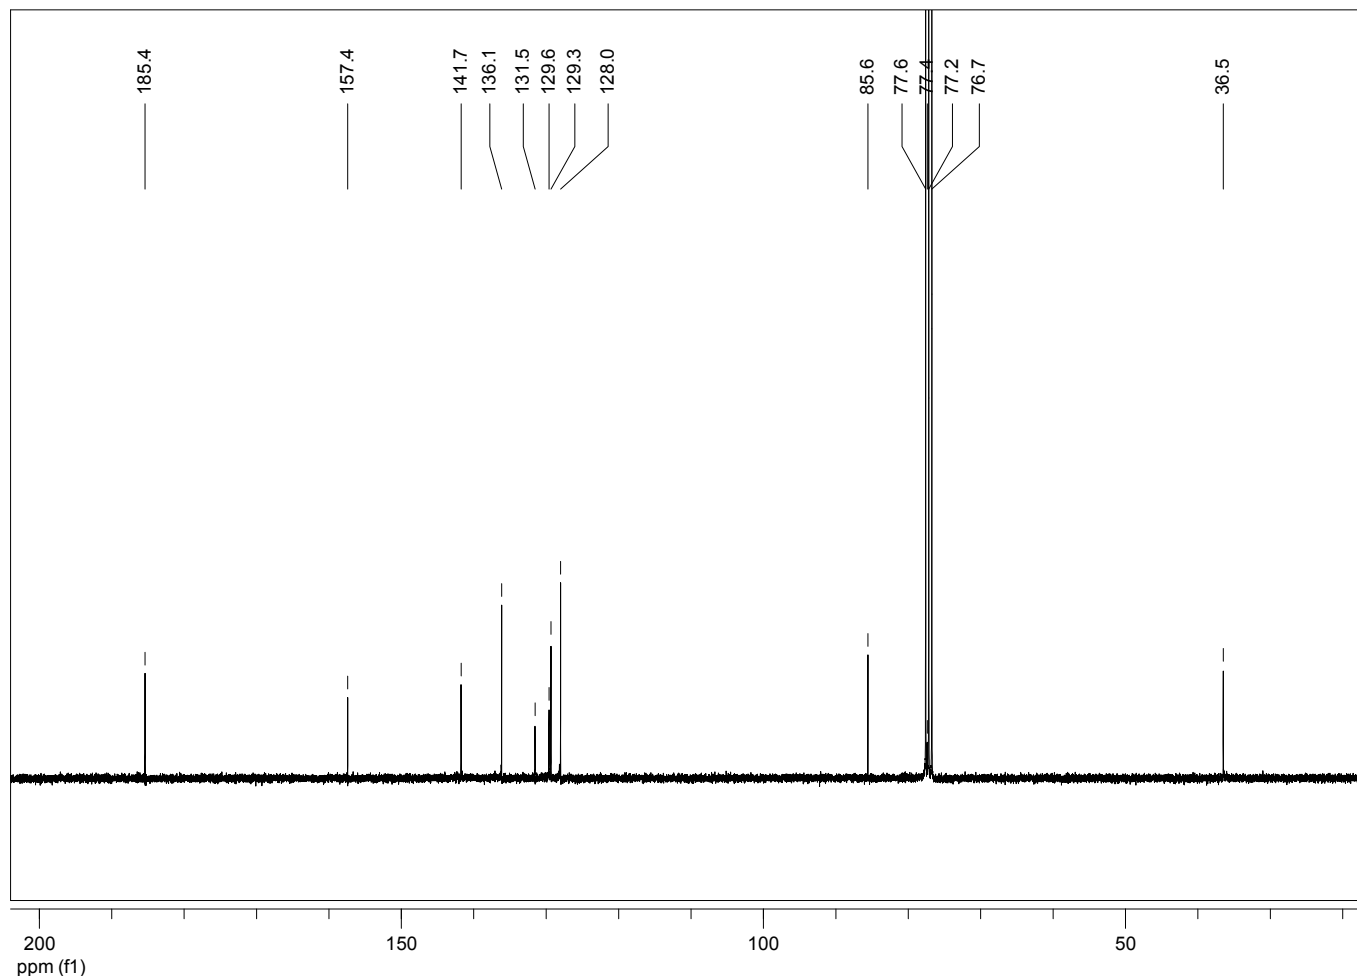

<sup>1</sup>H NMR spectrum of molecular clip 1 (CD<sub>2</sub>Cl<sub>2</sub>, 300 MHz) :

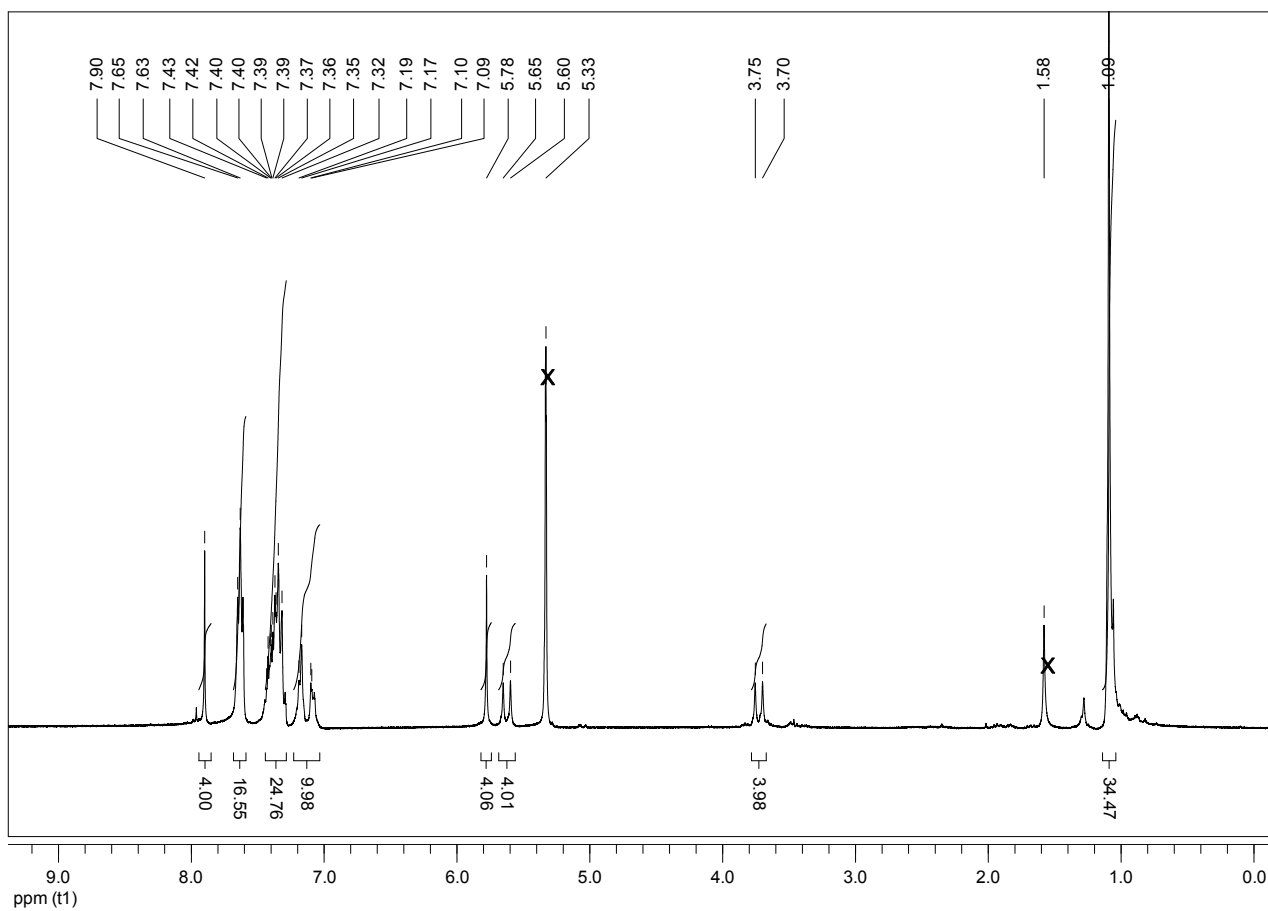

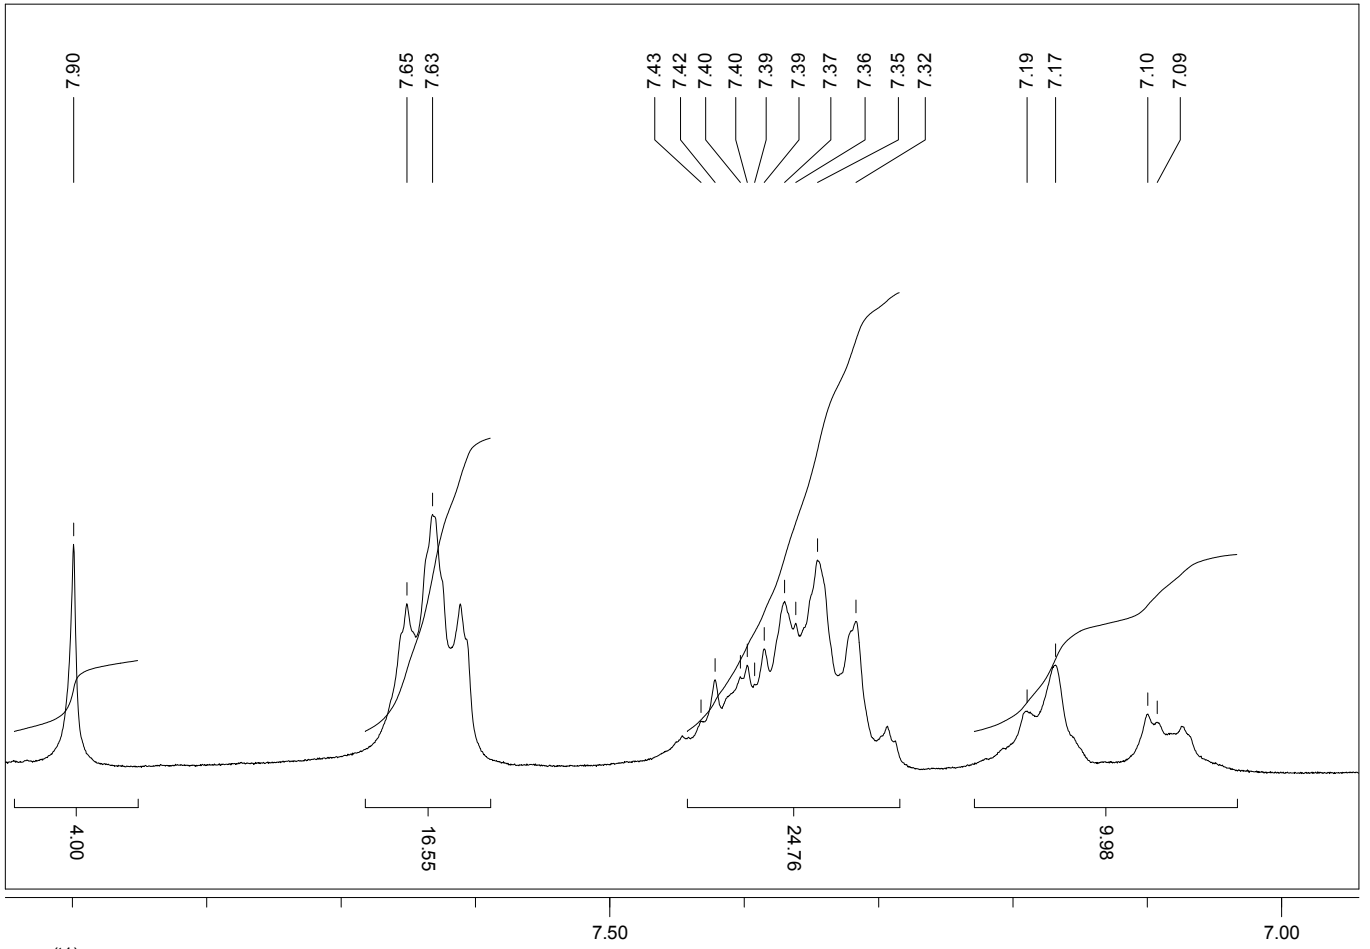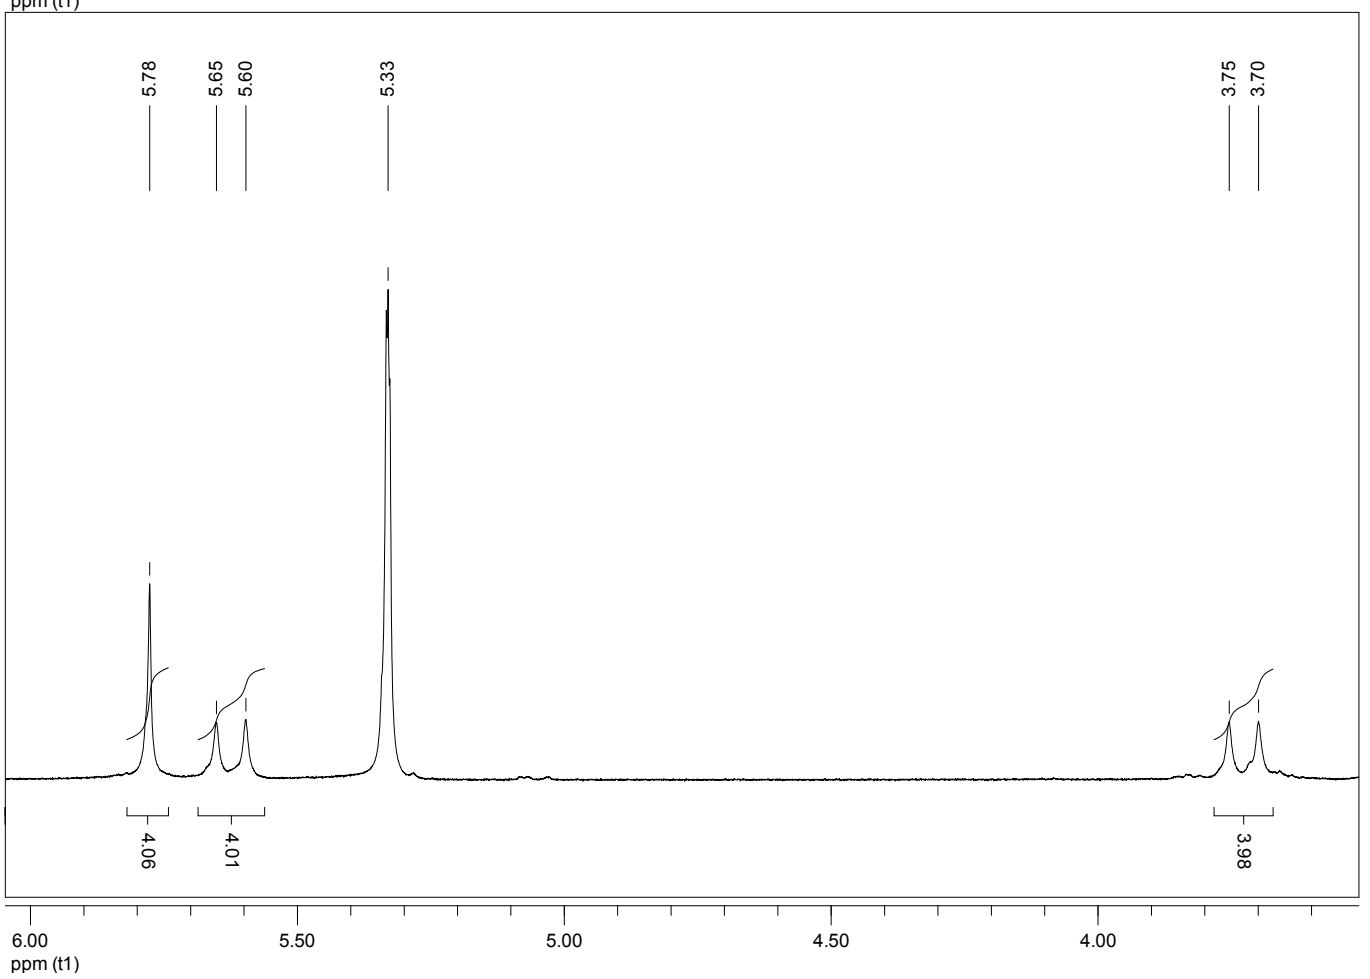

**<sup>13</sup>C NMR spectrum of molecular clip 1 (CD<sub>2</sub>Cl<sub>2</sub>, 300 MHz) :**

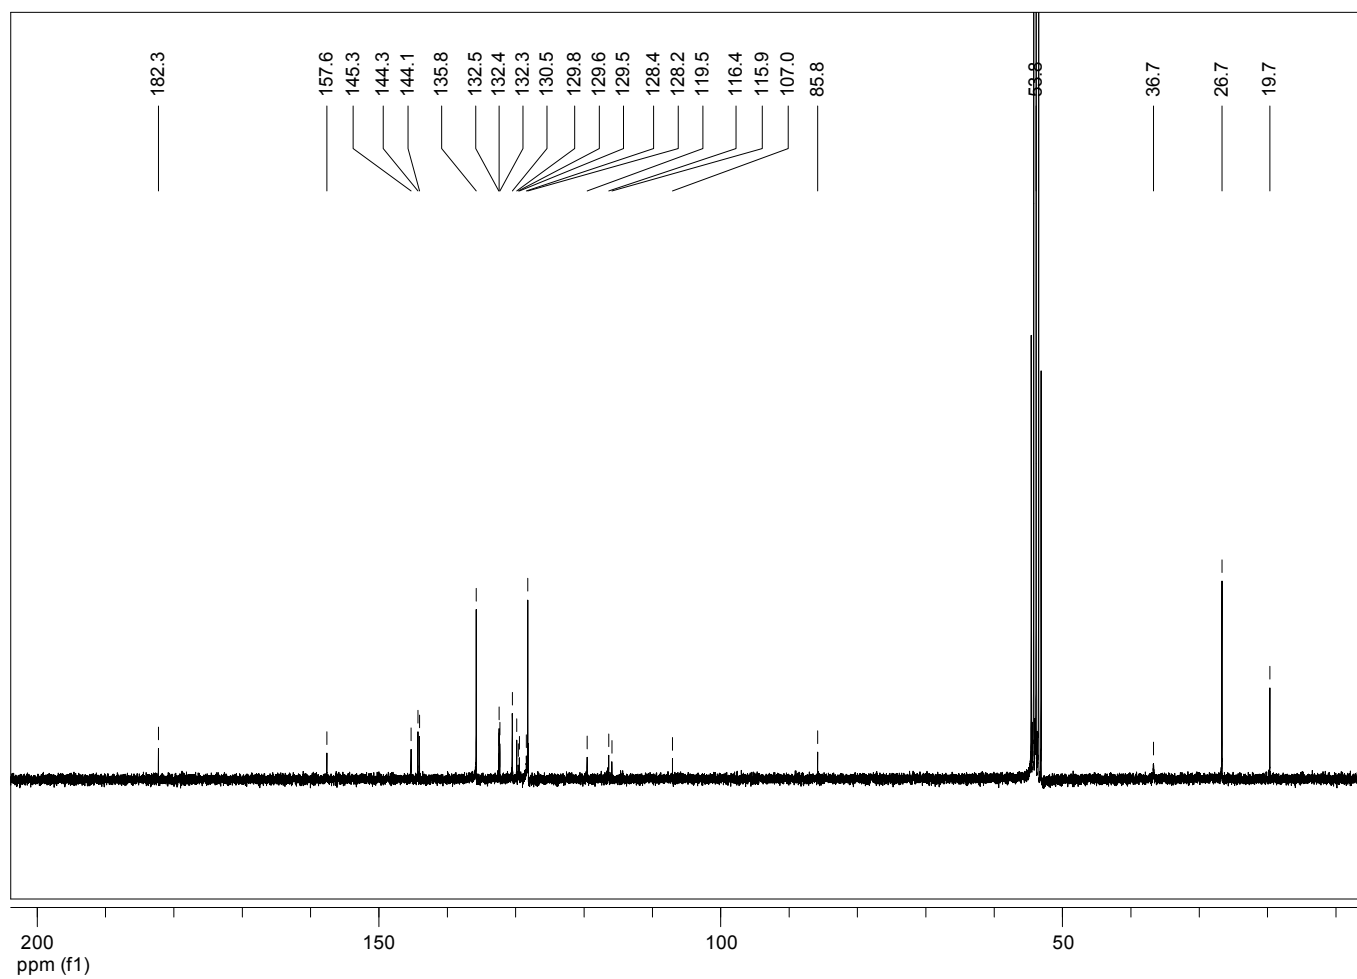

**MALDI-TOF spectrum of molecular clip 1 (Dithranol as the matrix) :**

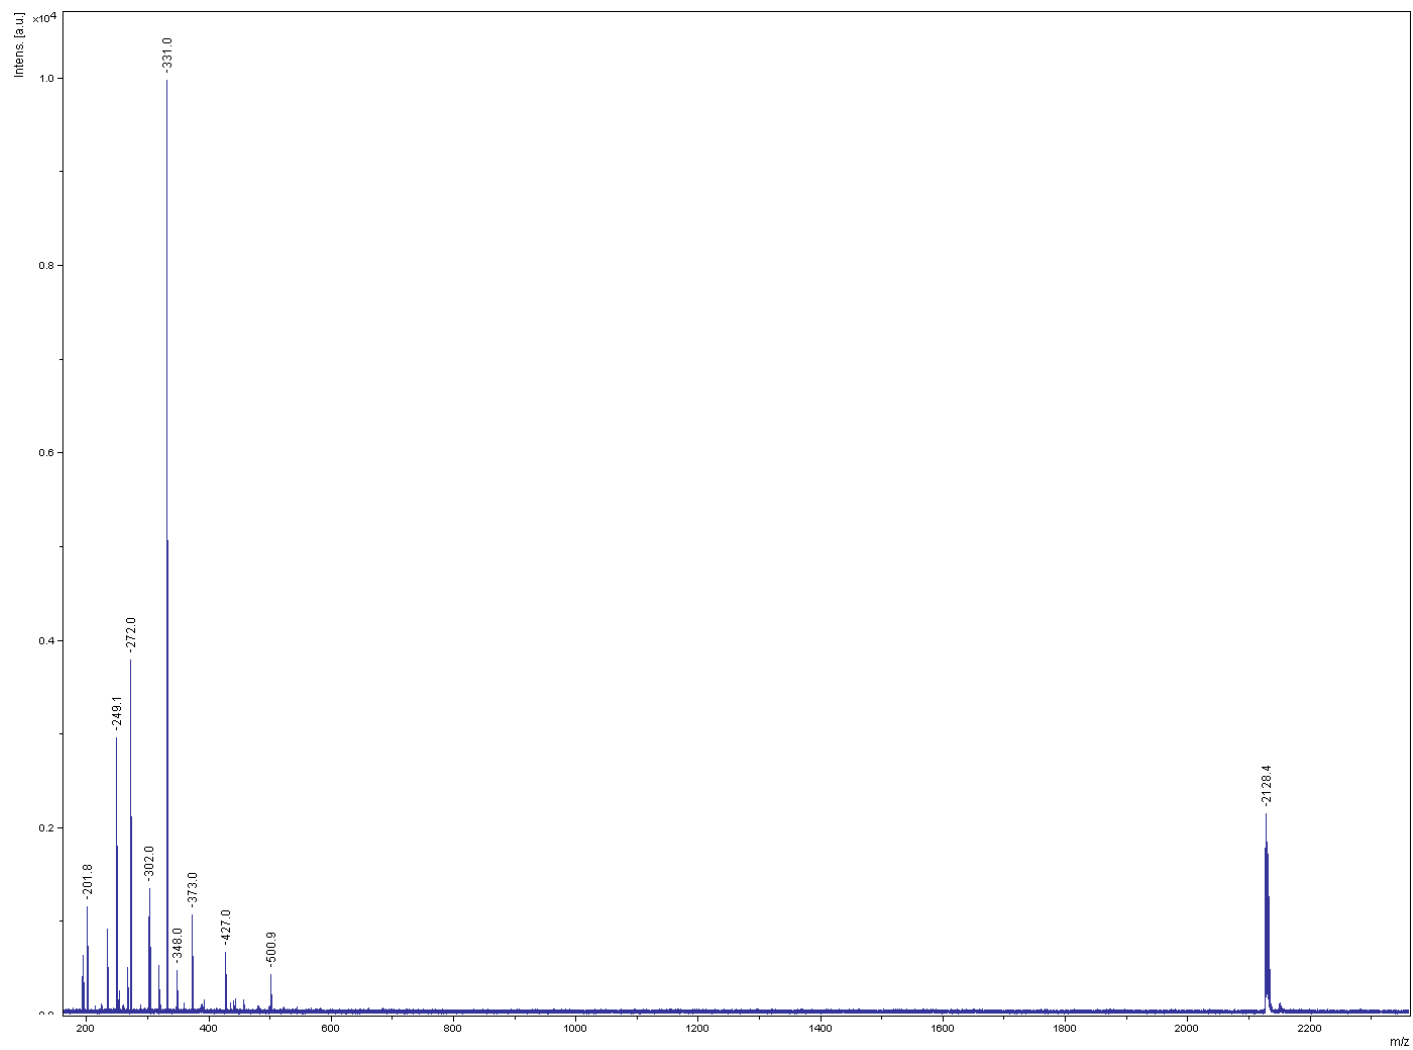

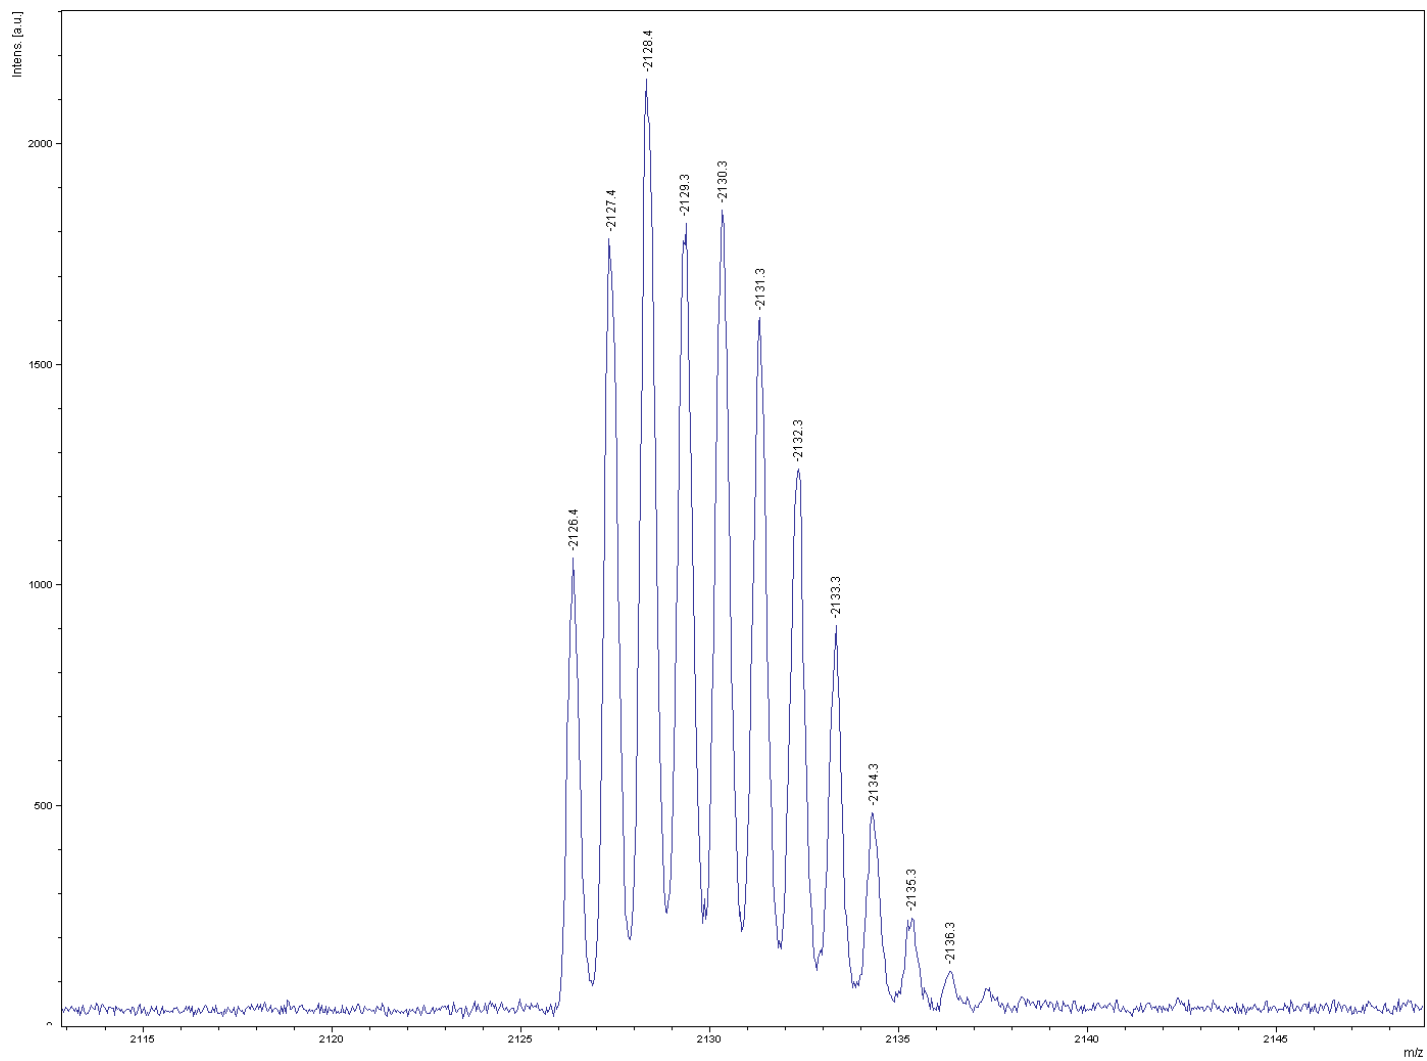



## Theoretical calculations :

Theoretical calculations were realized using semi-empirical AM1 method on molecular clip **1** without silylated groups on the hydroquinone moieties for simplification.

The angle  $\alpha$  defining the tapering cavity of the clip was determined to be close to  $31^\circ$  taking into account the two mean planes of the TTF-naphthoquinone arms. From these two planes, the distance ( $d = 9.73 \text{ \AA}$ ) was calculated as an average of the distances between both TTF central double bonds, *i.e.* the average of the distances C1-C3 ( $9.35 \text{ \AA}$ ) and C2-C4 ( $10.12 \text{ \AA}$ ).

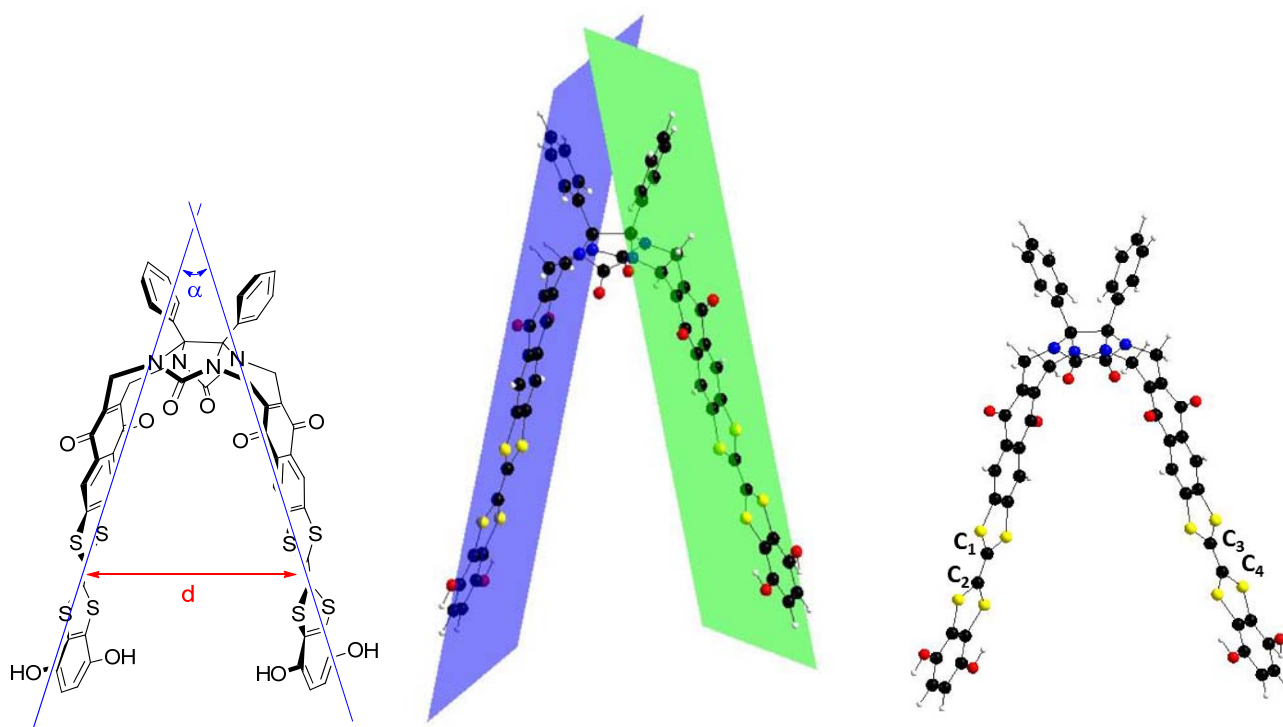

### Cyclic voltammetry of molecular clip **1** :

Cyclic voltammetry were carried out in a three-electrode cell equipped with a platinum millielectrode as working electrode, a platinum wire counter electrode and a silver wire in a 0.01 M solution of AgNO<sub>3</sub> in CH<sub>3</sub>CN as a reference electrode. The electrolytic media involved a 0.1 M solution of tetrabutylammonium-hexafluorophosphate (TBAHP - puriss quality) in CH<sub>3</sub>CN. The ferrocene/ferricinium couple (Fc/Fc<sup>+</sup>) was used as internal reference and the potentials were expressed versus a saturated calomel electrode (SCE) as a reference. All experiments were performed in a glove box containing dry, oxygen-free (< 1 ppm) argon, at room temperature. Electrochemical experiments were carried out with an EGG PAR 273A potentiostat.

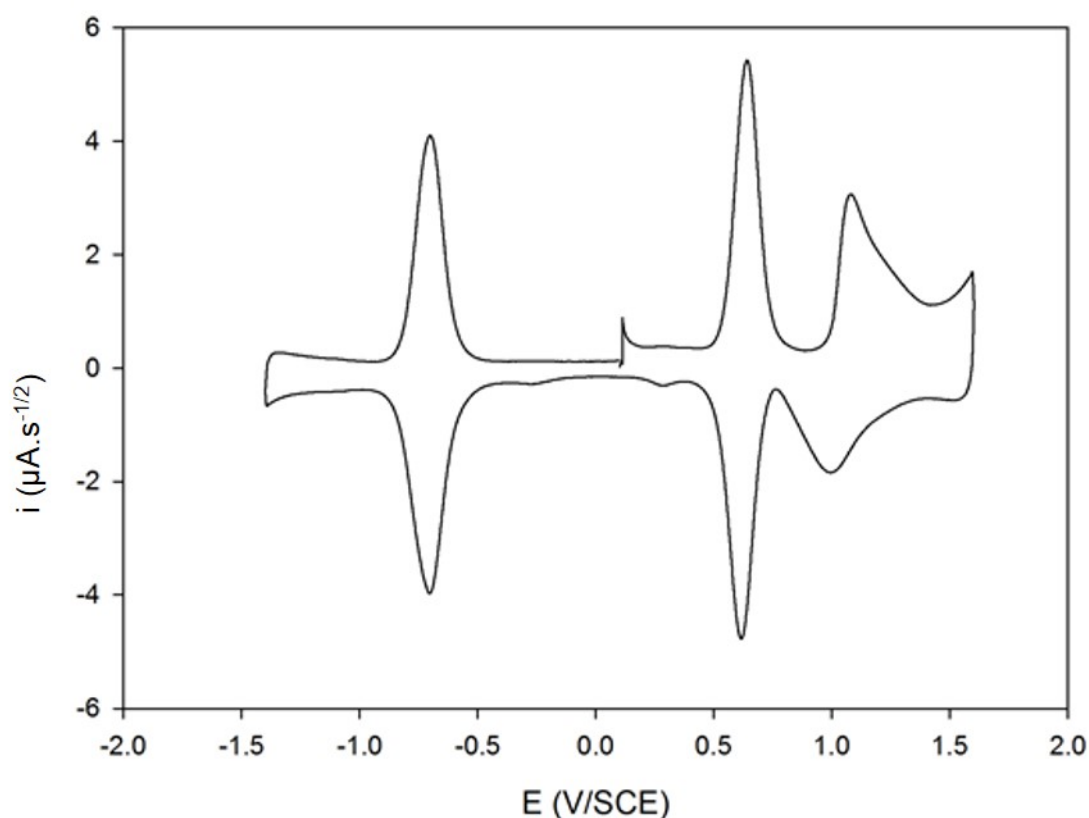

Deconvoluted cyclic voltammogram for molecular clip **1** :  $5 \cdot 10^{-4}$  M in CH<sub>2</sub>Cl<sub>2</sub>/CH<sub>3</sub>CN (9/1) in Bu<sub>4</sub>NPF<sub>6</sub> 0.1M. Pt as the working and counter electrode, Ag/Ag<sup>+</sup> reference electrode, scan rate 100 mV.s<sup>-1</sup>. Values are given vs SCE, the couple Fc/Fc<sup>+</sup> (E° = + 0.405 V vs SCE) being used as an internal reference.<sup>1</sup>

<sup>1</sup> (a) G. Gritzner and J. Kuta, *Pure Appl. Chem.*, 1984, **56**, 461. (b) N. G. Connelly and W. E. Geiger, *Chem. Rev.*, 1996, **96**, 877.

### Cyclic voltammetry of the molecular clip 1 titration with F<sub>4</sub>-TCNQ :

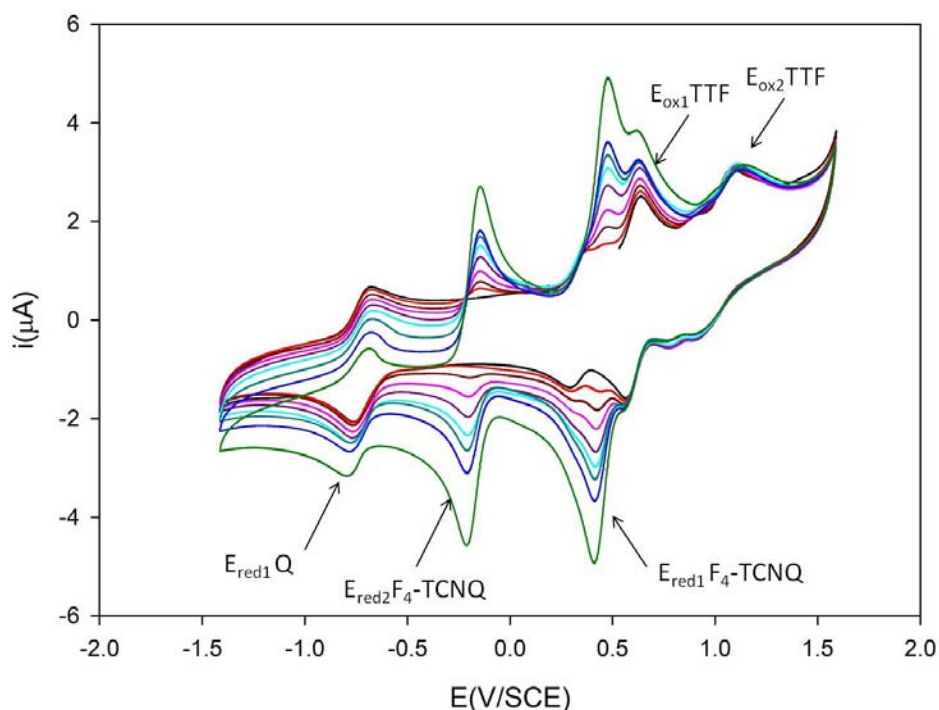

Cyclic voltammograms of molecular clip 1 [ $2.5 \cdot 10^{-4}$  M in CH<sub>2</sub>Cl<sub>2</sub>/CH<sub>3</sub>CN (9/1) in Bu<sub>4</sub>NPF<sub>6</sub> 0.1M] upon addition of F<sub>4</sub>-TCNQ aliquots [ $10^{-2}$  M in CH<sub>2</sub>Cl<sub>2</sub>/CH<sub>3</sub>CN (7/3)], scan rate : 100 mV.s<sup>-1</sup>.

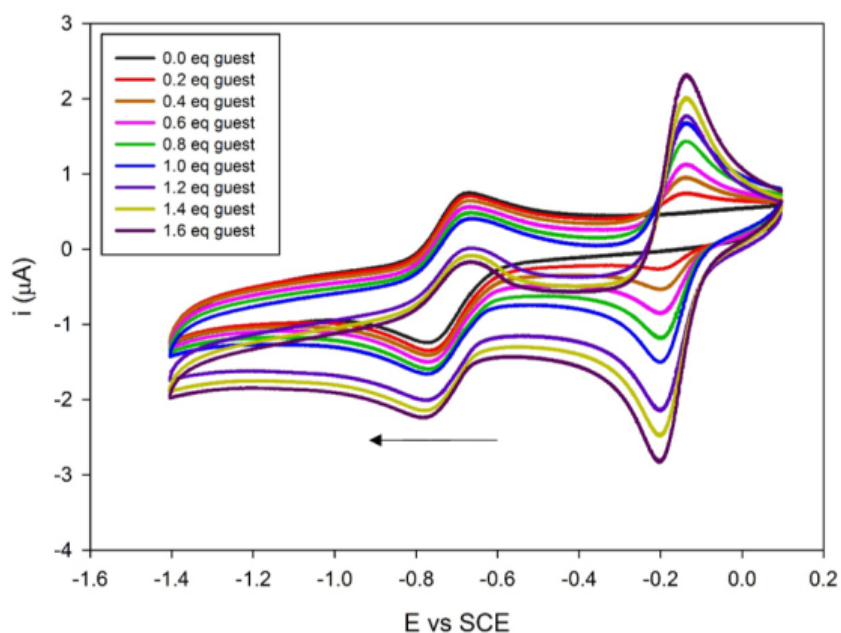

Cyclic voltammograms of molecular clip 1 [ $2.5 \cdot 10^{-4}$  M in CH<sub>2</sub>Cl<sub>2</sub>/CH<sub>3</sub>CN (9/1) in n-Bu<sub>4</sub>NPF<sub>6</sub> 0.1 M] upon addition of F<sub>4</sub>-TCNQ aliquots [ $10^{-2}$  M in CH<sub>2</sub>Cl<sub>2</sub>/CH<sub>3</sub>CN (7/3)], scan rate : 100 mV.s<sup>-1</sup>. The two reduction waves correspond to the second reduction wave of F<sub>4</sub>-TCNQ and the first reduction wave for quinone moiety at -0.22 V and -0.76 V vs SCE, respectively.

**$^{19}\text{F}$  NMR spectra ( $\text{CD}_2\text{Cl}_2$ ) of  $\text{F}_4\text{-TCNQ}$  :**

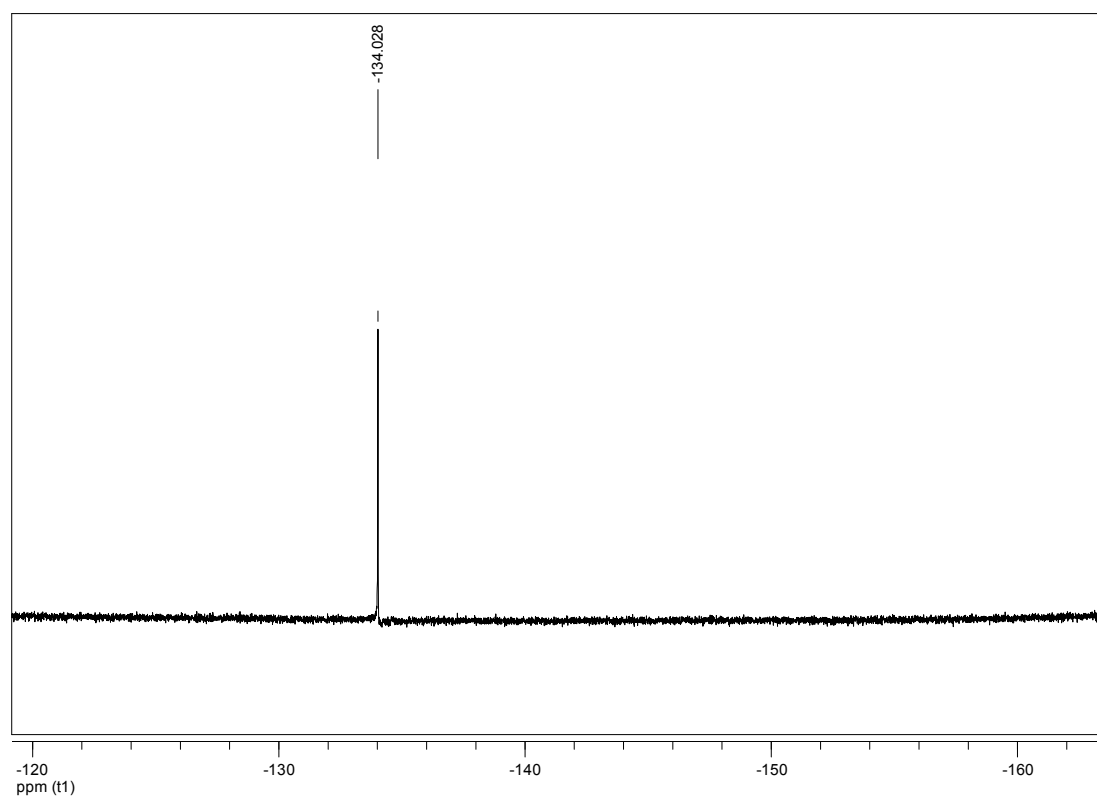

**$^{19}\text{F}$  NMR spectra ( $\text{CD}_2\text{Cl}_2$ ) of  $\text{F}_4\text{-TCNQ}$  after its addition to the solution of molecular clip 1 in stoichiometry (1:1) :**

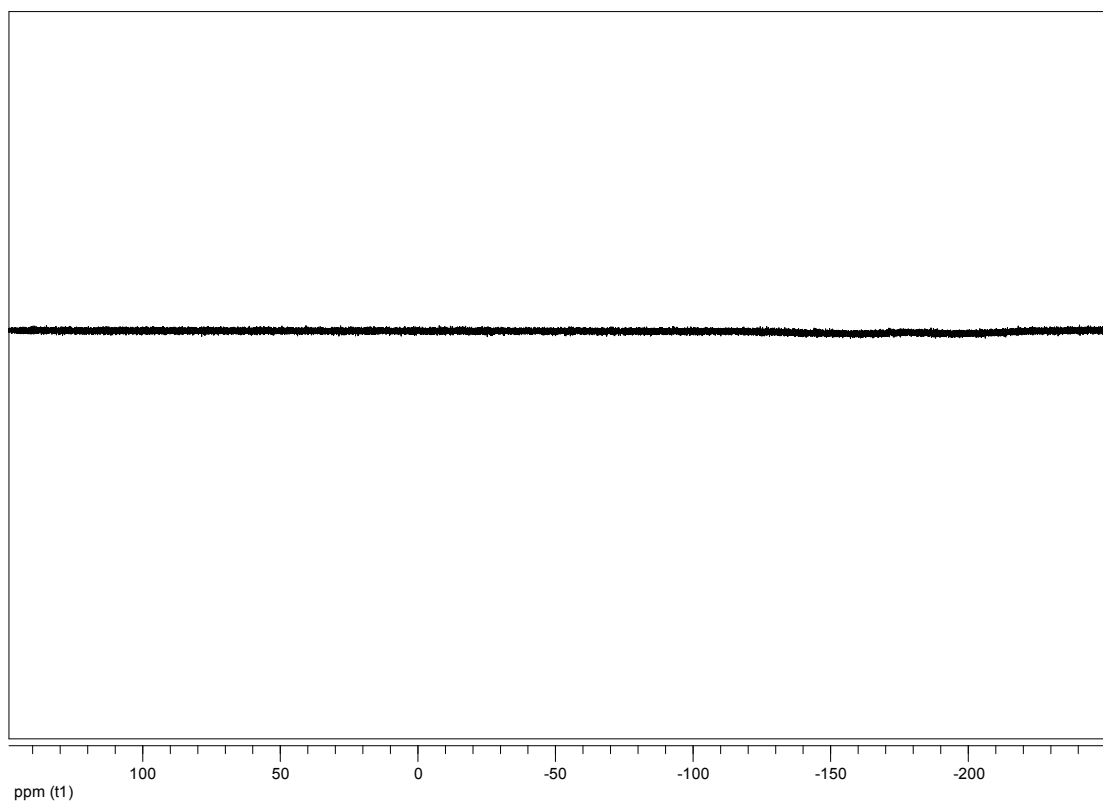

### Determination of binding constants by UV-Visible titration :

UV-Visible titrations were performed in a quartz cell with 1 cm path length at room temperature in  $\text{CH}_2\text{Cl}_2$ . Mixing the molecular clip **1** (H) solution with  $\text{F}_4\text{-TCNQ}$  (G) solution immediately produced green - colored solution, and strong characteristic bands of TTF cation radical and  $\text{F}_4\text{-TCNQ}$  anion radical bands were detected at 625 nm (TTTF), 760 and 860 nm ( $\text{F}_4\text{-TCNQ}$ ). Determination of the binding constants was performed using the absorbance of the band at 860 nm.

During the UV-Visible binding titration, the total guest concentration  $[\text{G}]_0$  was kept constant, whereas the total host concentration  $[\text{H}]_0$  was varied. Thus, the certain amount of host was dissolved in the stock solution of the guest with a concentration of  $[\text{G}]_0$ , followed by dilution of the sample with additional quantities of the same stock solution of the guest.

The following equation was used to determine the fit if the data to a 1:1 binding isotherm, after normalization of the guest concentration equal to 1.<sup>1</sup>

$$\Delta A_{\text{obsd}} = \varepsilon_C \left( \frac{[\text{H}]^\circ + [\text{G}]^\circ + \frac{1}{K_a}}{2} - \sqrt{\frac{\left([\text{H}]^\circ + [\text{G}]^\circ + \frac{1}{K_a}\right)^2}{4} - [\text{G}]^\circ \cdot [\text{H}]^\circ} \right)$$

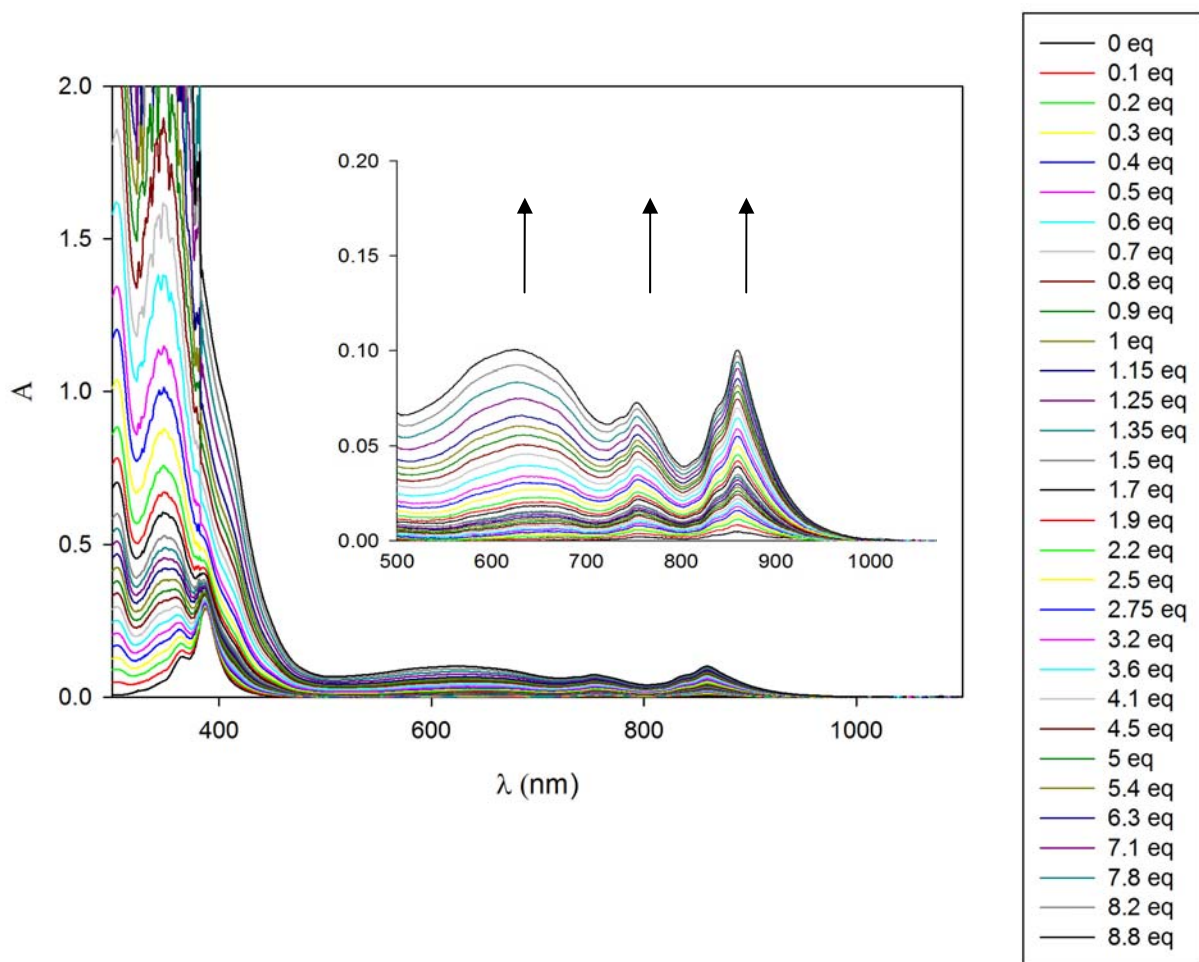

UV-Visible absorption spectra of F<sub>4</sub>-TCNQ (CH<sub>2</sub>Cl<sub>2</sub>, 10<sup>-5</sup> M) upon titration with molecular clip **1** (CH<sub>2</sub>Cl<sub>2</sub>, 5.0 × 10<sup>-4</sup> M). Inset : enlargement of the absorption spectra between 500 and 1000 nm.

## Chemical oxidation of molecular clip **1** followed by UV-Visible spectroscopy :

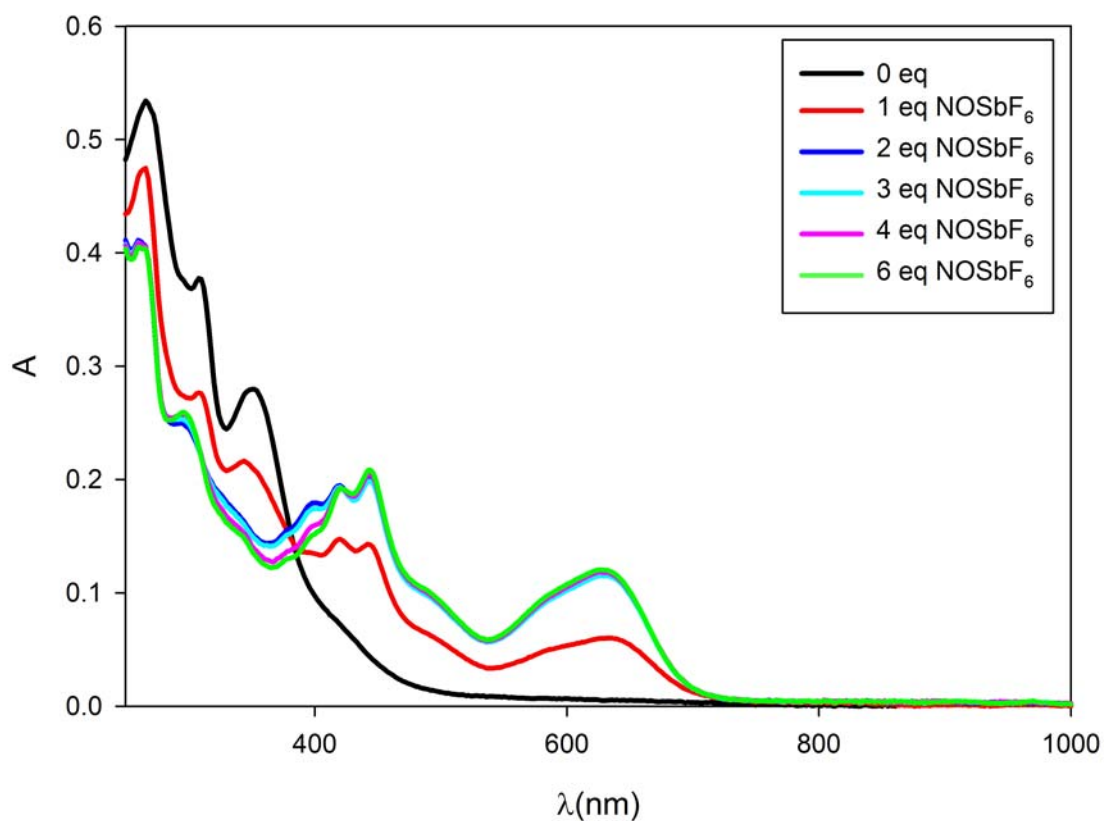

UV-Visible absorption spectra corresponding to the chemical oxidation of molecular clip **1** (10<sup>-5</sup> M in CH<sub>2</sub>Cl<sub>2</sub>) using successive aliquot addition of NOSbF<sub>6</sub> (10<sup>-2</sup> M in CH<sub>2</sub>Cl<sub>2</sub> / CH<sub>3</sub>CN 1/1) used as oxidizing reagent

<sup>1</sup> Düker, M. H.; Schäfer, H.; Zeller, M.; Azov, V. A. *J. Org. Chem.* **2013**, *78*, 4905-4912.
